# Supplementary material
Source: MDPI journal article supplement (https://www.mdpi.com/2673-7426/3/2/29)
Supplement: s1 [file s1 › biomedinformatics-2364881-supplementary.pdf]

# Supplementary Figure S1

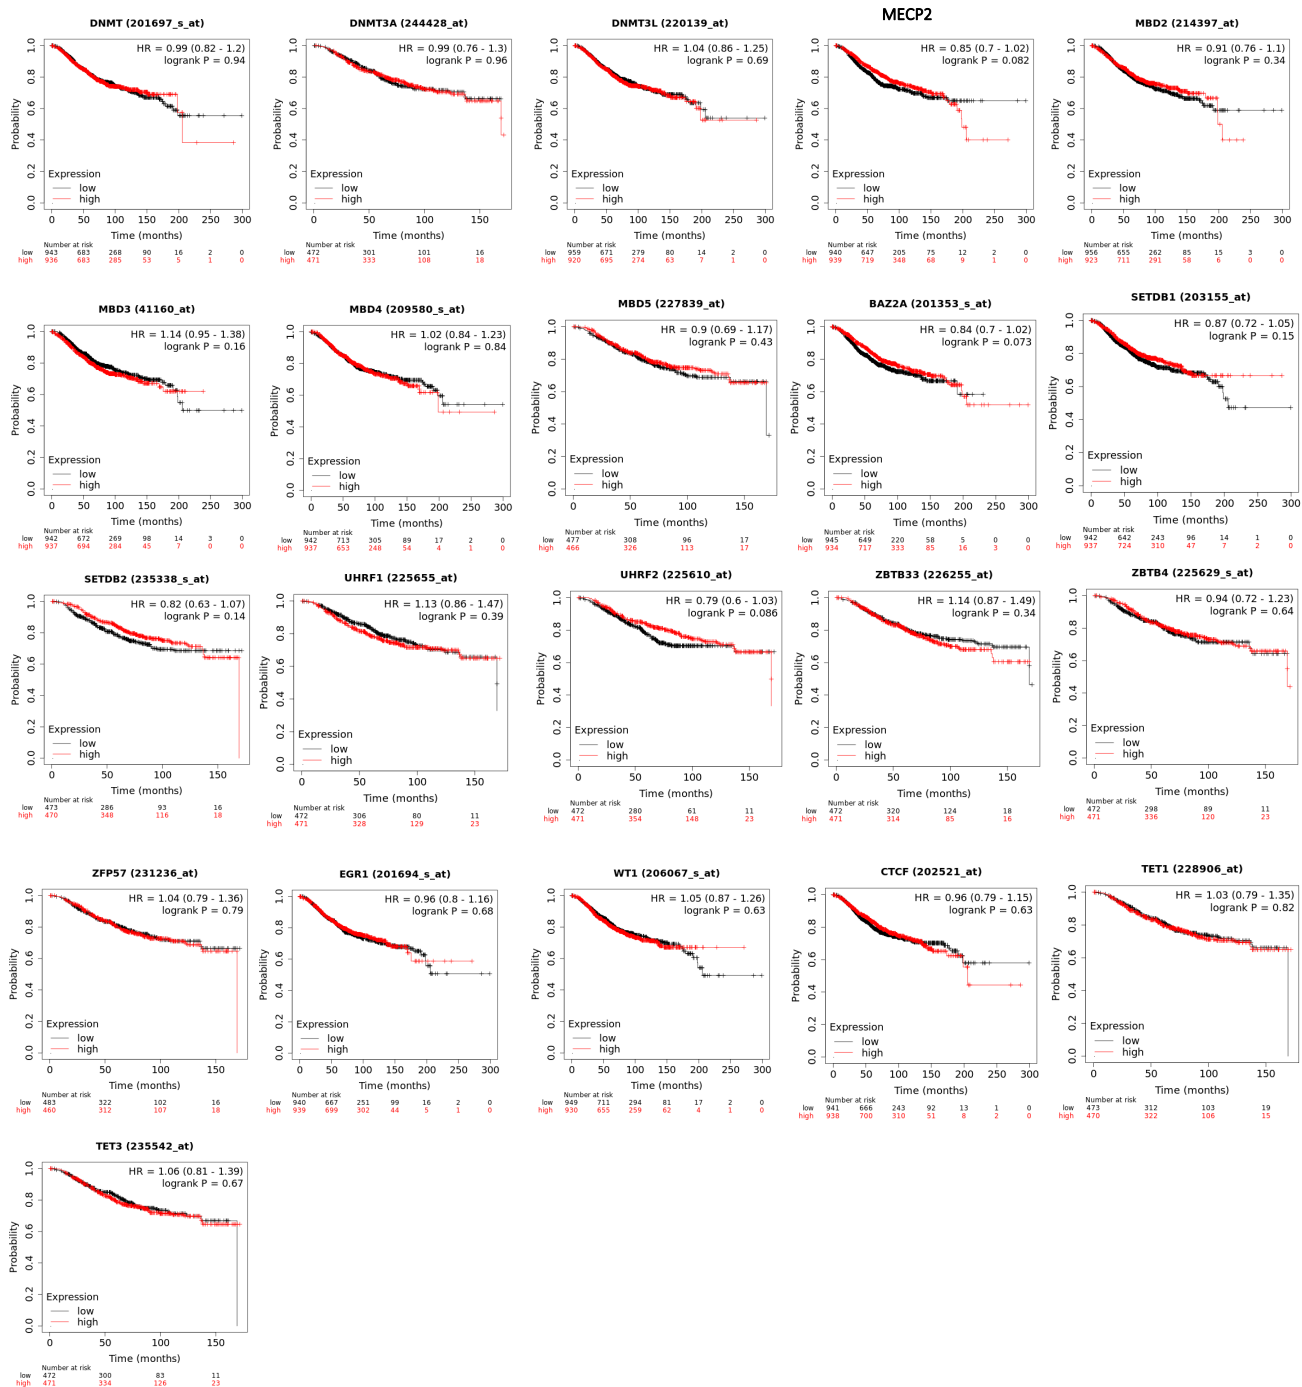

Meier-Kaplan plots showing overall breast cancer patient survival. The X axis denotes patient overall survival percentage, while the Y axis represents months after the diagnosis. Black color represents the low expression group, while the high expression group is indicated by the red color. The patients were split by median. The log-rank test is used to determine p-values.
